# Supplementary material for: RGS5 Determines Neutrophil Migration in the Acute Inflammatory Phase of Bleomycin-Induced Lung Injury
Source: MDPI journal article supplement (doi:10.3390/ijms22179342), 2021-08-28
Supplement: s1 [file s1]

## Supplementary tables

**Supplementary Table S1: Clinical characteristics of patients with interstitial lung disease (ILD) and controls with detailed use of material**

| Lung ID/Diagnosis | Age  | Sex    | BMI   | FEV1(%) | FVC(%) | FEV1/FVC(%) | LTOT | Material used             |
|-------------------|------|--------|-------|---------|--------|-------------|------|---------------------------|
| Control 1         | 43   | Female | 22.43 | NA      | NA     | NA          | no   | Lung tissue, RNA          |
| Control 2         | 40   | Female | 20.76 | NA      | NA     | NA          | no   | Lung tissue, RNA          |
| Control 3         | 17   | Male   | 17.96 | NA      | NA     | NA          | no   | Lung tissue, RNA          |
| Control 4         | 62   | Male   | 23.12 | NA      | NA     | NA          | no   | Lung tissue, RNA          |
| Control 5         | 59   | Male   | 26.3  | NA      | NA     | NA          | no   | Lung tissue, RNA          |
| Control 6         | 70   | Female | 22.04 | NA      | NA     | NA          | no   | Lung tissue, RNA          |
| Control 7         | 58   | Female | 22.86 | NA      | NA     | NA          | no   | Lung tissue, RNA          |
| Control 8         | 42   | Female | NA    | NA      | NA     | NA          | no   | Lung tissue, RNA, protein |
| Control 9         | 24   | Female | 21.7  | NA      | NA     | NA          | no   | Lung tissue, RNA          |
| Control 10        | 71   | Female | NA    | NA      | NA     | NA          | no   | Lung tissue, RNA          |
| Control 11        | 53   | Female | 31.11 | NA      | NA     | NA          | no   | Protein                   |
| Control 12        | 39   | Female | 24.22 | NA      | NA     | NA          | no   | Protein                   |
| Control 13        | 52   | Male   | NA    | NA      | NA     | NA          | no   | Protein                   |
| Control 14        | 19   | Male   | NA    | NA      | NA     | NA          | no   | Protein                   |
| Control 15        | 73   | Female | NA    | NA      | NA     | NA          | no   | Protein                   |
|                   |      |        |       |         |        |             |      |                           |
| ILD 1/HP          | 66.5 | Female | 26.93 | 49      | 47     | 104         | yes  | Lung tissue, RNA, protein |
| ILD 2/HP          | 64.2 | Male   | 28.09 | 67      | NA     | NA          | no   | Lung tissue, RNA, protein |
| ILD 3/CTD         | 58.2 | Female | 17.31 | 30      | 31     | 97          | yes  | Lung tissue, RNA, protein |
| ILD 4/IPF         | 54   | Male   | 24.15 | 40      | 34.9   | 115         | yes  | Lung tissue, protein      |
| ILD 5/IPF         | 60   | Male   | 21.88 | 34      | 36.2   | 94          | yes  | Lung tissue, RNA          |
| ILD 6/IPF         | 72.3 | Male   | 24.3  | 41      | 35     | 117         | yes  | Lung tissue, RNA, Protein |
| ILD 7/NSIP        | 48.4 | Female | 21.5  | 40      | 40     | 100         | yes  | Lung tissue, RNA, Protein |
| ILD 8/IPF         | 63.7 | Male   | 23.03 | 47.5    | 40     | 119         | yes  | Lung tissue, RNA          |
| ILD 9/HP          | 54.7 | Male   | 32.05 | 31      | 27.5   | 113         | yes  | Lung tissue, RNA          |
| ILD 10/IPF        | 58.2 | Male   | 17.92 | 41      | NA     | NA          | yes  | Lung tissue, RNA          |
| ILD 11/HP         | 68   | Male   | 18.83 | 46.2    | 37.2   | 124         | yes  | Lung tissue, RNA          |
| ILD 12/HP         | 67.5 | Male   | 33.25 | 59.4    | 53.1   | 112         | yes  | Lung tissue               |
| ILD 13/IPF        | 56   | Male   | NA    | NA      | NA     | 76          | NA   | Lung tissue               |
| ILD 14/IPF        | 63   | Male   | NA    | NA      | NA     | 93          | NA   | Lung tissue               |
| ILD 15/IPF        | 66   | Female | NA    | NA      | NA     | 89          | NA   | Lung tissue               |

BMI: Body mass index (Kg/m<sup>2</sup>); FEV1: Forced expiratory volume in 1 s; FVC: Forced vital capacity; LTOT: Long-term oxygen therapy; CTD: Connective tissue diseases; HP: Hypersensitivity pneumonitis; IPF: Idiopathic pulmonary fibrosis; NSIP: Nonspecific interstitial pneumonia; NA: Not available.

**Supplementary Table S2: Clinical characteristics of patients with acute respiratory distress syndrome (ARDS) with detailed use of material**

| <b>Lung ID</b> | <b>Age</b> | <b>Sex</b> | <b>Background</b> | <b>Modified APACHE II</b> | <b>PaO<sub>2</sub>/FiO<sub>2</sub> (mmHg)</b> | <b>Material used</b> |
|----------------|------------|------------|-------------------|---------------------------|-----------------------------------------------|----------------------|
| ARDS 1         | 40         | Female     | Pneumonia         | 11                        | 83                                            | Lung tissue          |
| ARDS 2         | 51         | Female     | Trauma            | 6                         | 181.5                                         | Lung tissue          |
| ARDS 3         | 67         | Male       | Sepsis            | 20                        | 109                                           | Lung tissue          |

**Supplementary Table S3: Antibodies for flow-cytometry analysis of immune cells from BALF and lung tissue**

| <b>Antigen</b>  | <b>Label</b> | <b>company</b> | <b>Clone</b> | <b>isotype</b>   | <b>dilution</b> |
|-----------------|--------------|----------------|--------------|------------------|-----------------|
| CD45            | PerCP-Cy5.5  | eBioscience    | 30-F11       | Rat IgG2b. κ     | 1:200           |
| CD45            | FITC         | Thermo Fisher  | 30-F11       | Rat IgG2b. κ     | 1:200           |
| CD11b           | ef506        | Thermo Fisher  | M1/70        | Rat IgG2b. κ     | 1:50            |
| CD11c           | ef450        | Thermo Fisher  | N418         | Hamster IgG      | 1:50            |
| Gr-1(Ly6G/Ly6C) | PE-Cy7       | Biolegend      | RB6-8C5      | Rat IgG2b. κ     | 1:800           |
| CD64            | AF647        | BD Bioscience  | X54-5/7.1    | Mouse IgG1. κ    | 1:20            |
| Siglec-F        | PE           | BD Bioscience  | E50-2240     | Rat IgG2a. κ     | 1:20            |
| MHC-II          | APC-Cy7      | Biolegend      | M5/114.15.2  | Rat IgG2b. κ     | 1:400           |
| CD3             | AF700        | Thermo Fisher  | eBio500A2    | Hamster IgG      | 1:50            |
| CD4             | APC          | Biolegend      | GK 1.5       | Rat IgG2b. κ     | 1:100           |
| CD8             | PE           | Biolegend      | 53-6.7       | Rat IgG2a. κ     | 1:100           |
| CD19            | BB515        | BD Bioscience  | 1D3          | Rat IgG2a. κ     | 1:50            |
| NK1.1           | SB600        | eBioscience    | PK136        | Mouse / IgG2a. κ | 1:20            |
| γδTCR           | ef450        | Thermofischer  | eBiogL3      | Hamster IgG      | 1:50            |

**Supplementary Table S4: Antibodies for western blots and stainings**

| Antibodies | Company/catalogue number    | Experiments           | Sample/Dilution                    |
|------------|-----------------------------|-----------------------|------------------------------------|
| RGS5       | Santa cruz/(B-4) sc514184   | IHC (mouse and human) | Lung tissue/1:250                  |
|            |                             | western blot          | Protein/1:1000                     |
|            | Abcam/196799                | IHC                   | Neutrophils/1:100                  |
| Ly6G       | Biolegend/12706             | IHC                   | Lung tissue/ 1:200                 |
|            | Biolegend/127618            | FACS                  | Bone marrow.<br>blood.spleen/1:800 |
|            |                             | FACS                  | Neutrophils/1:800                  |
| Cd11b      | Invitrogen/69011282         | FACS                  | Neutrophils/1:50                   |
| CXCR2      | Biolegend/149312            | FACS                  | Neutrophils/1:40                   |
| CXCR4      | Biolegend/146505            | FACS                  | Neutrophils/1:40                   |
| Erk        | Cell signaling/9102S        | Western blot          | Protein/ 1:1000                    |
| pErk       | Cell signaling/9101S        | Western blot          | Protein/ 1:1000                    |
| GAPDH      | Santa cruz/(FL-335) sc25778 | Western blot          | Protein/ 1:1000                    |
| β-actin    | Santa cruz/(C-4) sc47778    | Western blot          | Protein/ 1:1000                    |

**Supplementary Table S5: Primers sequences for human and mouse**

| Primers | Species | Forward (5'-3')            | Reverse (5'-3')          |
|---------|---------|----------------------------|--------------------------|
| RGS1    | Human   | TTGAGTTCTGGCTGGCTTGTG      | GCAGCATCTGAATGCACAAATG   |
| RGS2    | Human   | TTCTGGCTGGCCTGTGAAG        | GCAGTTGTAAAGCAGCCACTTG   |
| RGS3    | Human   | GCACACCAAGGACAACCTGC       | ACGGAGAAAGCGAGGGTACG     |
| RGS4    | Human   | ACCAGGGAAGAGACAAGCCG       | ACTTGAGGAAGCGGCGGTAG     |
| RGS5    | Human   | ACCTGGTGGAACCTTCCCTG       | AACTCAGAGCGCACAAAGCG     |
| RGS8    | Human   | CTGCATTCCGTGCCTTCTTG       | TTTACCTCCCGTGGAGCCTG     |
| RGS13   | Human   | CGGTGGAGCAGAATTTCTAGGG     | TGTTTCAGTGGGTTCCCTGAATG  |
| RGS16   | Human   | AACCTGCAGACTGCCACAGC       | CGGTAAGCAGGCGACTTCAG     |
| RGS18   | Human   | CAAGGGACCTCAACAAATTCACC    | TGGAGGGTAGGTTGAGTGATGC   |
| β2M     | Human   | CCTGGAGGCTATCCAGCGTACTCC   | TGTCGGATGGATGAAACCCAGACA |
| CXCL1   | Mouse   | CCTTGACCCTGAAGCTCCCT       | CGGTGCCATCAGAGCAGTCT     |
| CXCL2   | Mouse   | ACATCCAGAGCTTGAGTGTGA      | TTCAGGGTCAAGGCAAACCTT    |
| β2M     | Mouse   | CGGCCTGTATGCTATCCAGAAAAACC | TGTGAGGCGGGTGGAAGTGTG    |
| IL-1β   | Mouse   | GCCACCTTTTGACAGTGATGAG     | GACAGCCCAGGTCAAAGGTT     |
| IL-6    | Mouse   | ACAACCACGGCCTTCCCTACTT     | CACGATTTCCAGAGAACATGTG   |
| IL-10   | Mouse   | ATAACTGCACCCACTTCCCA       | TCATTTCCGATAAGGCTTGG     |
| IL-13   | Mouse   | GCCAAGATCTGTGTCTCTCCC      | CCAGGTCCACACTCCATACC     |
| IL-17   | Mouse   | AGGACGCGCAAACATGAGTC       | GGACACGCTGAGCTTTGAGG     |
| IL-33   | Mouse   | ACCATGAGACCTAGAATGAAGTAT   | TTAGATTTTCGAGAGCTTAAAC   |
| IFN-γ   | Mouse   | CAGCAACAGCAAGGCGAAAAAGG    | TTTCCGCTTCTGAGGCTGGAT    |
| TNF-α   | Mouse   | CATCTTCTCAAAATTCGAGTGACAA  | TGGGAGTAGACAAGGTACAACCC  |
