# Supplementary figures and images for: RGS5 Determines Neutrophil Migration in the Acute Inflammatory Phase of Bleomycin-Induced Lung Injury
Source: MDPI journal article supplement (doi:10.3390/ijms22179342), 2021-08-28

**Figure 1C**

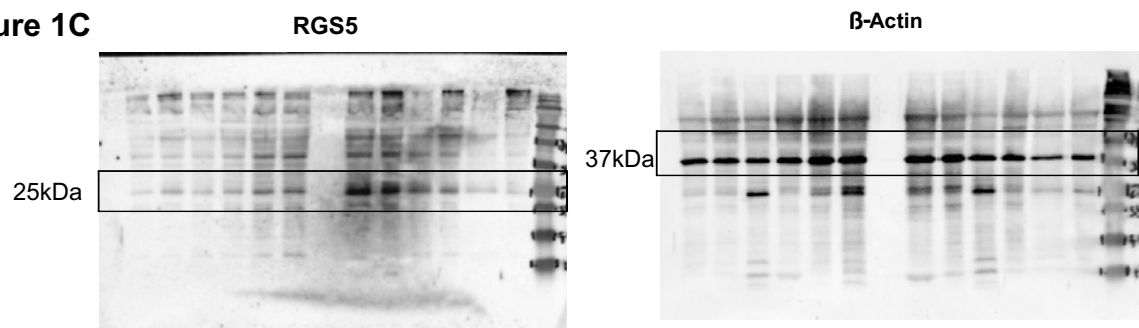

**Figure 2C**

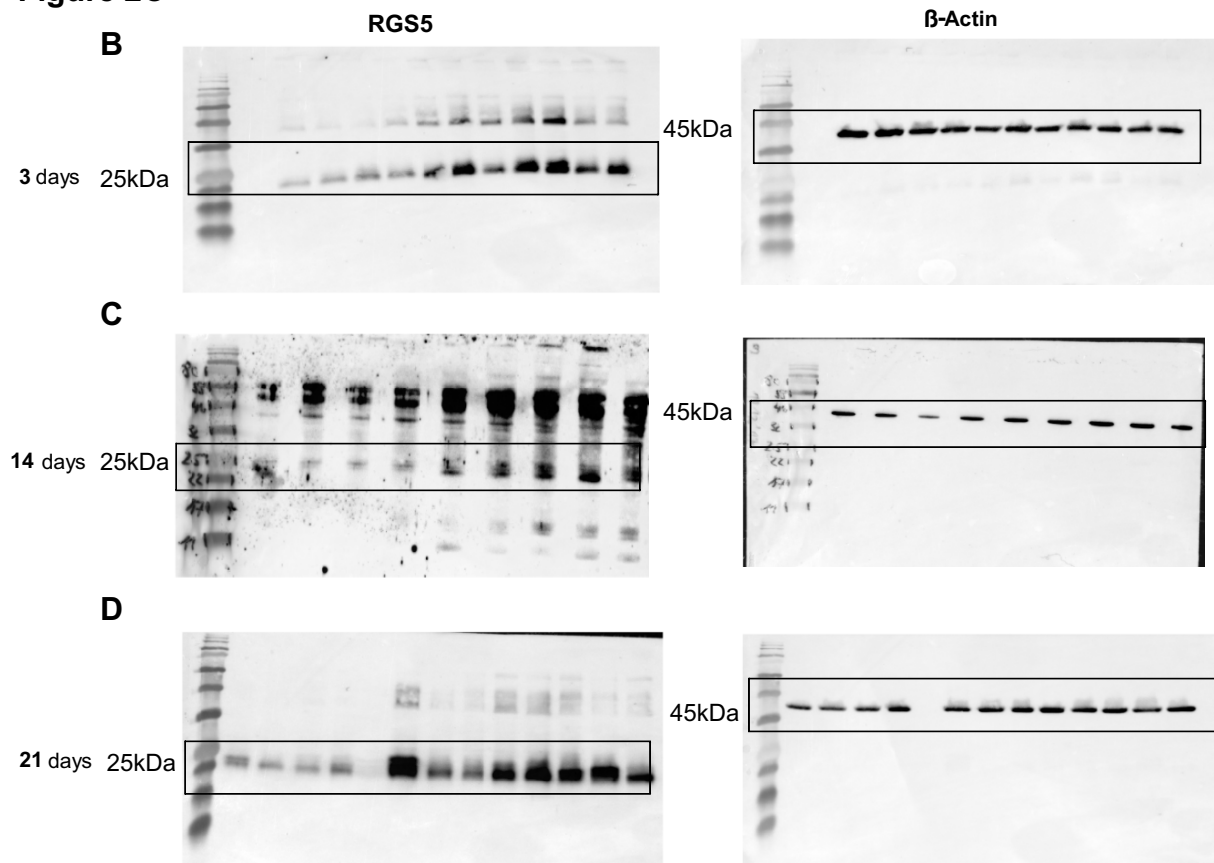

fMLP

Figure 7A

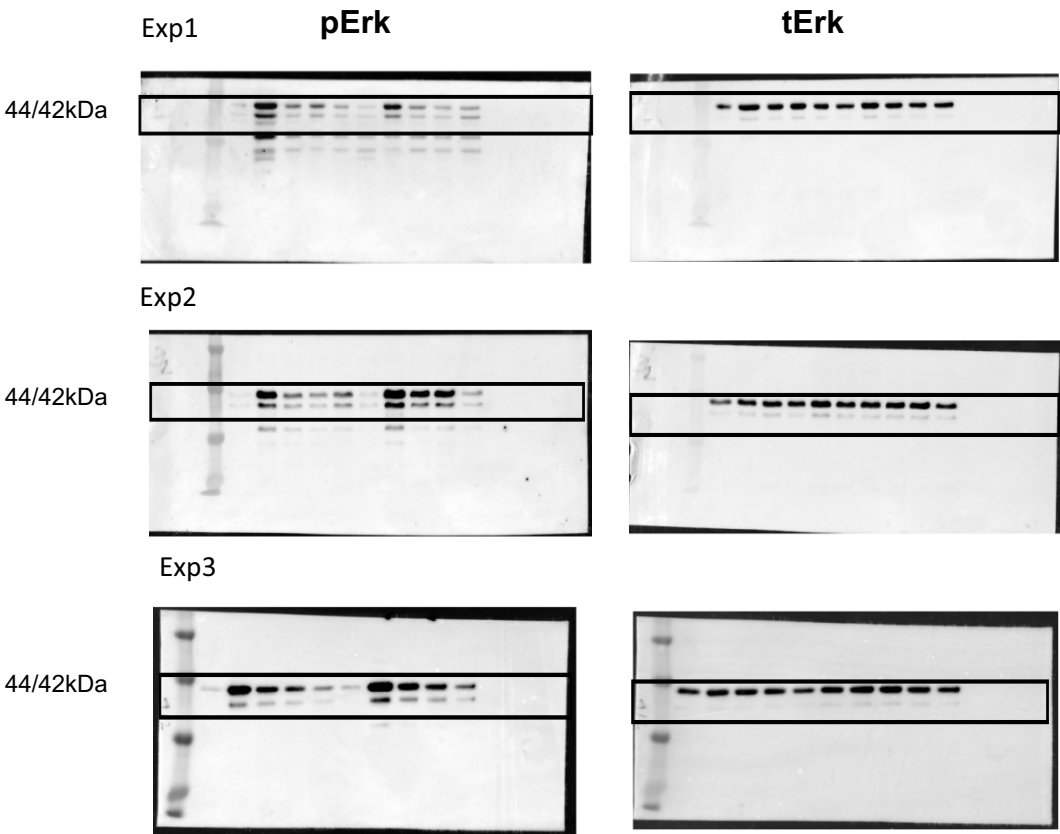

Figure 7A

CXCL1

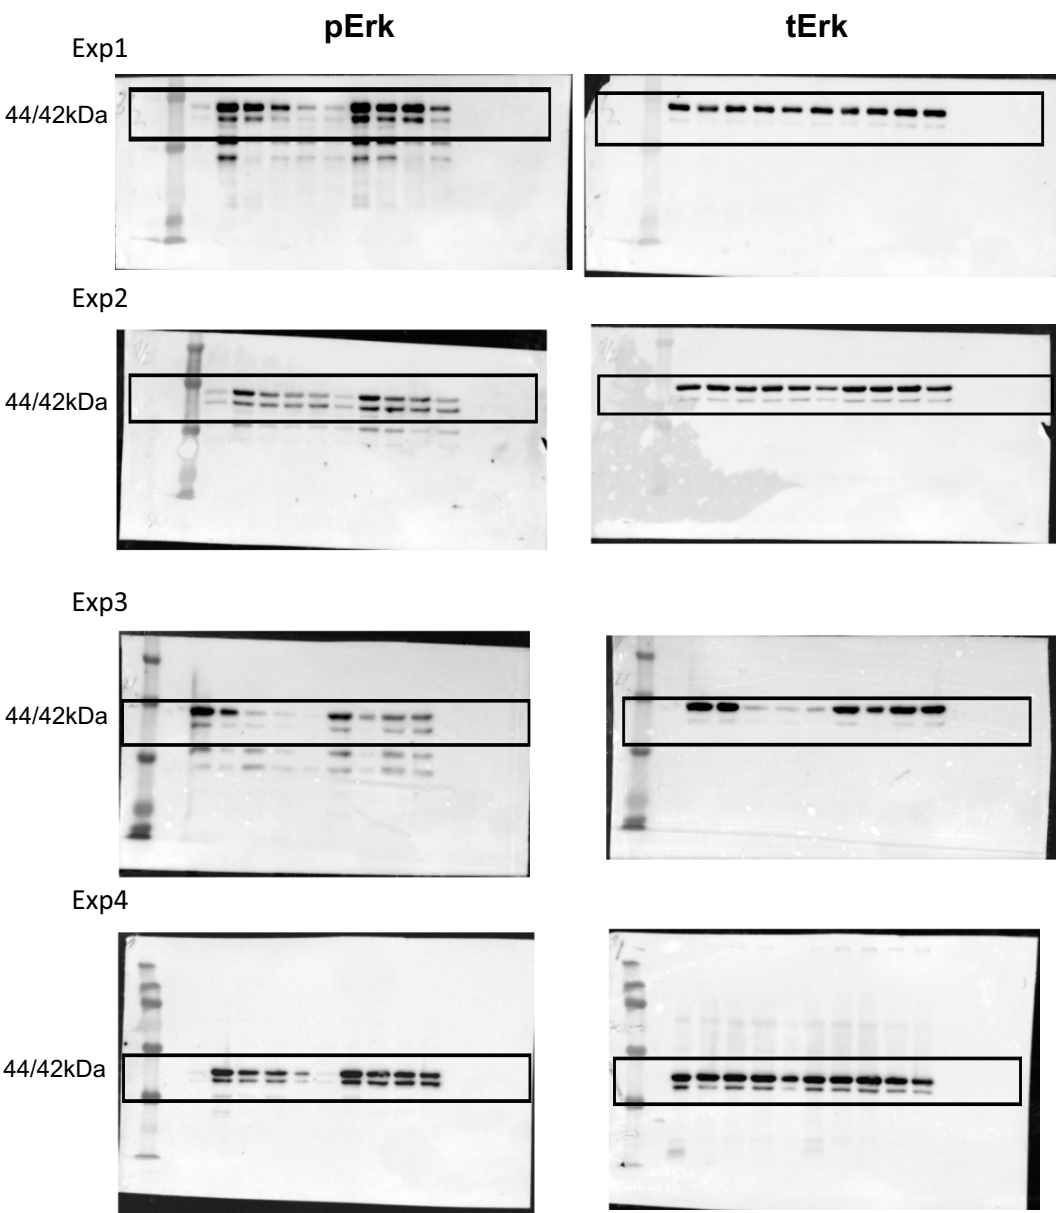

Figure 7A

CXCL2

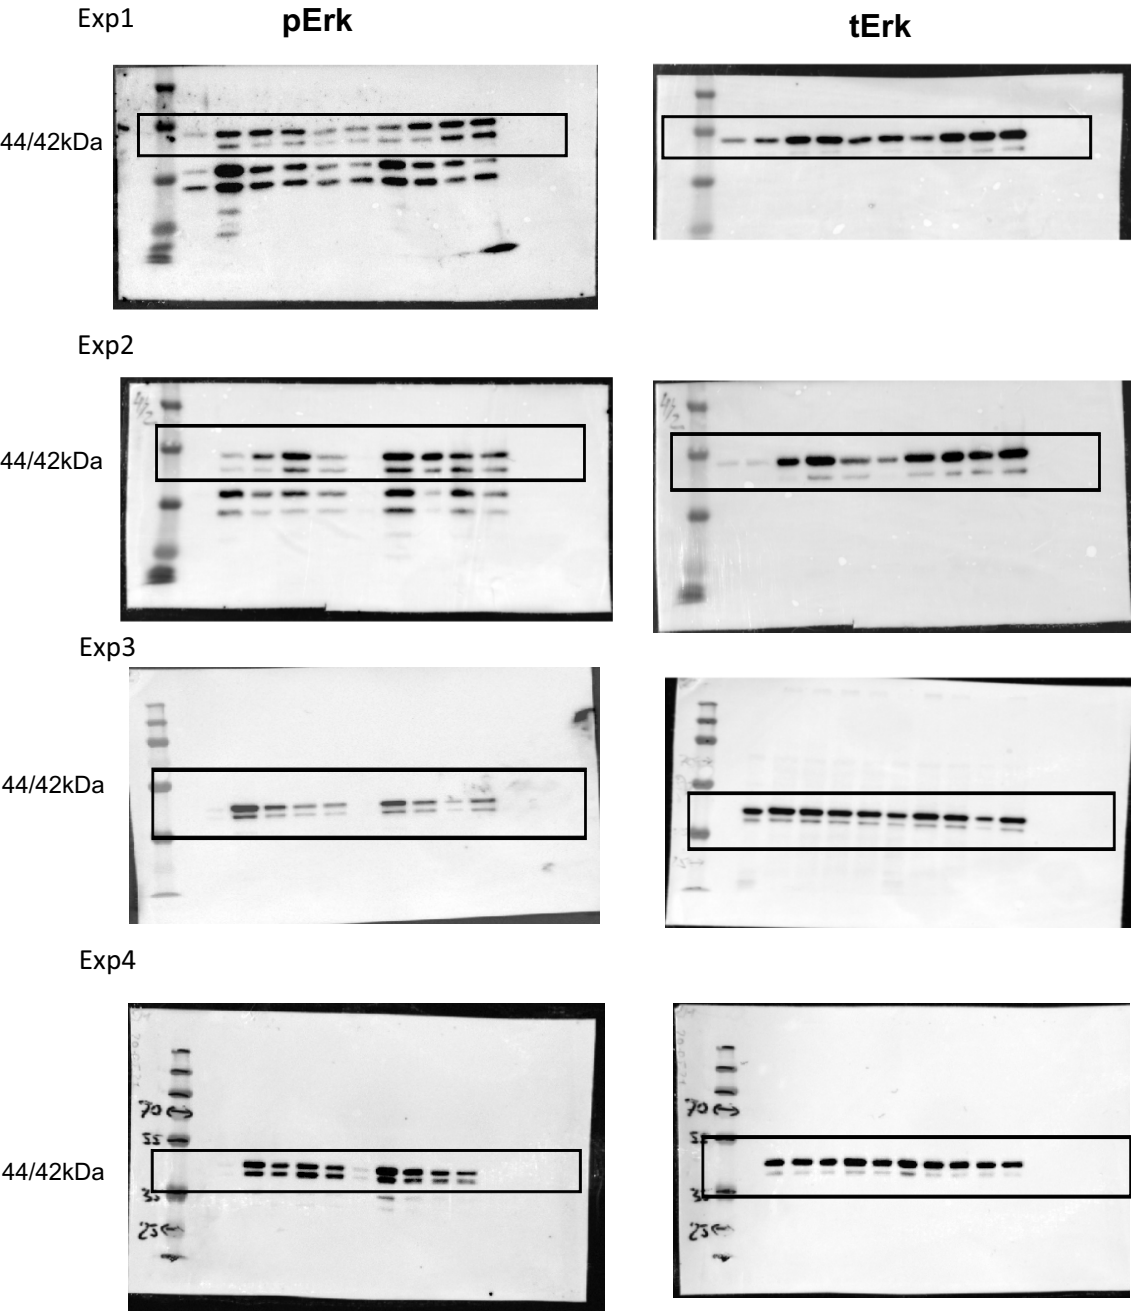

Supplement: s1 [file s1]
